# Supplementary material for: Aptamer-Conjugated Tb(III)-Doped Silica Nanoparticles for Luminescent Detection of Leukemia Cells
Source: PubMed Central journal article supplement (PMC7168109; doi:10.3390/biomedicines8010014), 2020-01-13
Supplement: biomedicines-08-00014-s001.pdf [file biomedicines-08-00014-s001.pdf]

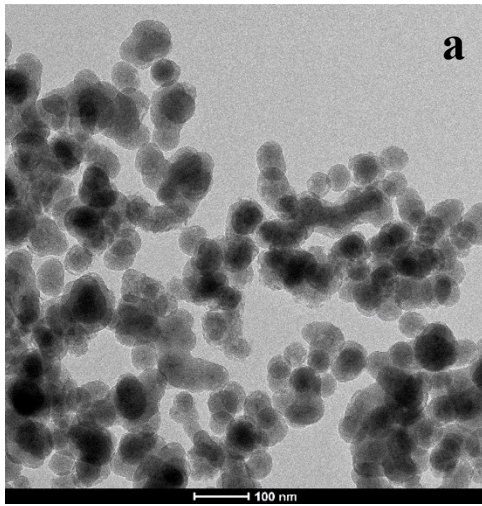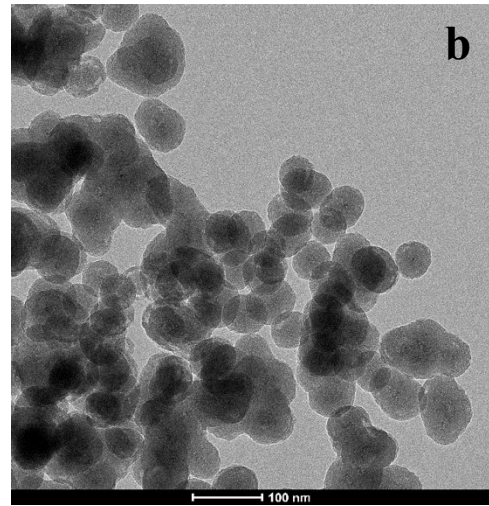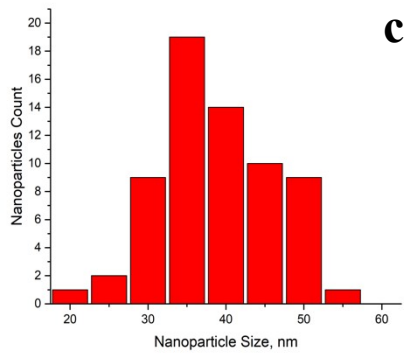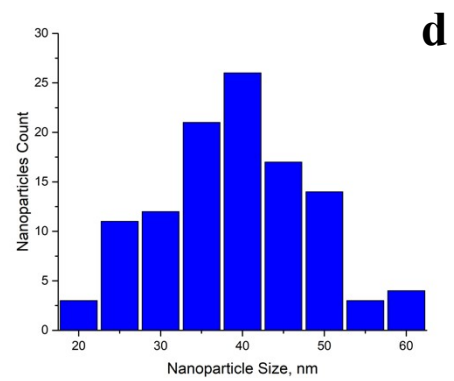

**Figure S1.** TEM images of SNs-COOH and SNs-NH<sub>2</sub> (a, b) and nanoparticles size distribution (c, d). Average diameter of SNs-COOH –  $39 \pm 10$  nm, SNs-NH<sub>2</sub> –  $39 \pm 12$  nm.

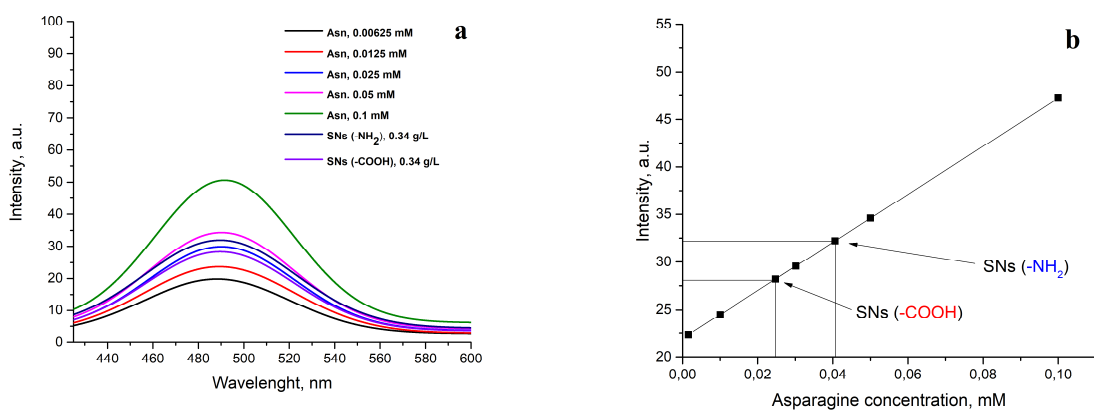

**Figure S2.** (a) Fluorescamine emission spectra with various concentration of asparagine (0.00625 mM, 0.0125 mM, 0.025 mM, 0.05 mM, 0.1 mM) and SNs-NH<sub>2</sub> (0.34 g L<sup>-1</sup>) and SNs-COOH (0.34 g L<sup>-1</sup>). All spectra were obtained in 50 mM borate buffer, [Fluorescamine] = 0.924 M under excitation wavelength – 390 nm. (b) Calibration curve.

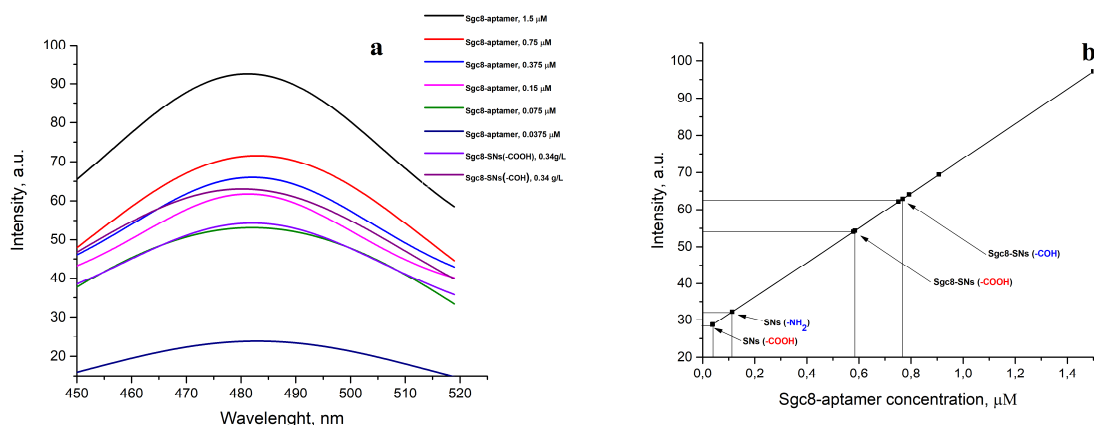

**Figure S3.** (a) Fluorescamine fluorescence spectra after interaction with various concentration of Sgc8-aptamer (1.5 μM, 0.75 μM, 0.375 μM, 0.15 μM, 0.075 μM, 0.0375 μM) and SNs-NH<sub>2</sub>, SNs-COOH, Sgc8-SNs(COH) (0.34 g L<sup>-1</sup>) and Sgc8-SNs(COOH) (0.34 g L<sup>-1</sup>). All spectra were obtained in 50 mM borate buffer under excitation wavelength – 390 nm. (b) Calibration curve.

**Table S1.** Zeta potential values and concentration of Sgc8-aptamer, SNs-COOH, SNs-NH<sub>2</sub>, Sgc8-SNs (-COOH) and Sgc8-SNs (-COH) in water.

| Sample                        | Concentration of NPs, g L <sup>-1</sup> | Concentration of aptamers, μM | ξ-Potential, mV |
|-------------------------------|-----------------------------------------|-------------------------------|-----------------|
| Sgc-8-NH <sub>2</sub> aptamer | -                                       | 0.1                           | -35             |
|                               | -                                       | 0.5                           | -29             |
| SNs-NH <sub>2</sub>           | 0.01                                    | -                             | -7              |
|                               | 0.05                                    | -                             | -4              |
| Sgc8-SNs(COH)                 | 0.01                                    | -                             | -24             |
|                               | 0.05                                    | -                             | -22             |
| SNs-COOH                      | 0.01                                    | -                             | -9              |
|                               | 0.05                                    | -                             | -9              |
| Sgc8-SNs(COOH)                | 0.01                                    | -                             | -27             |
|                               | 0.05                                    | -                             | -23             |

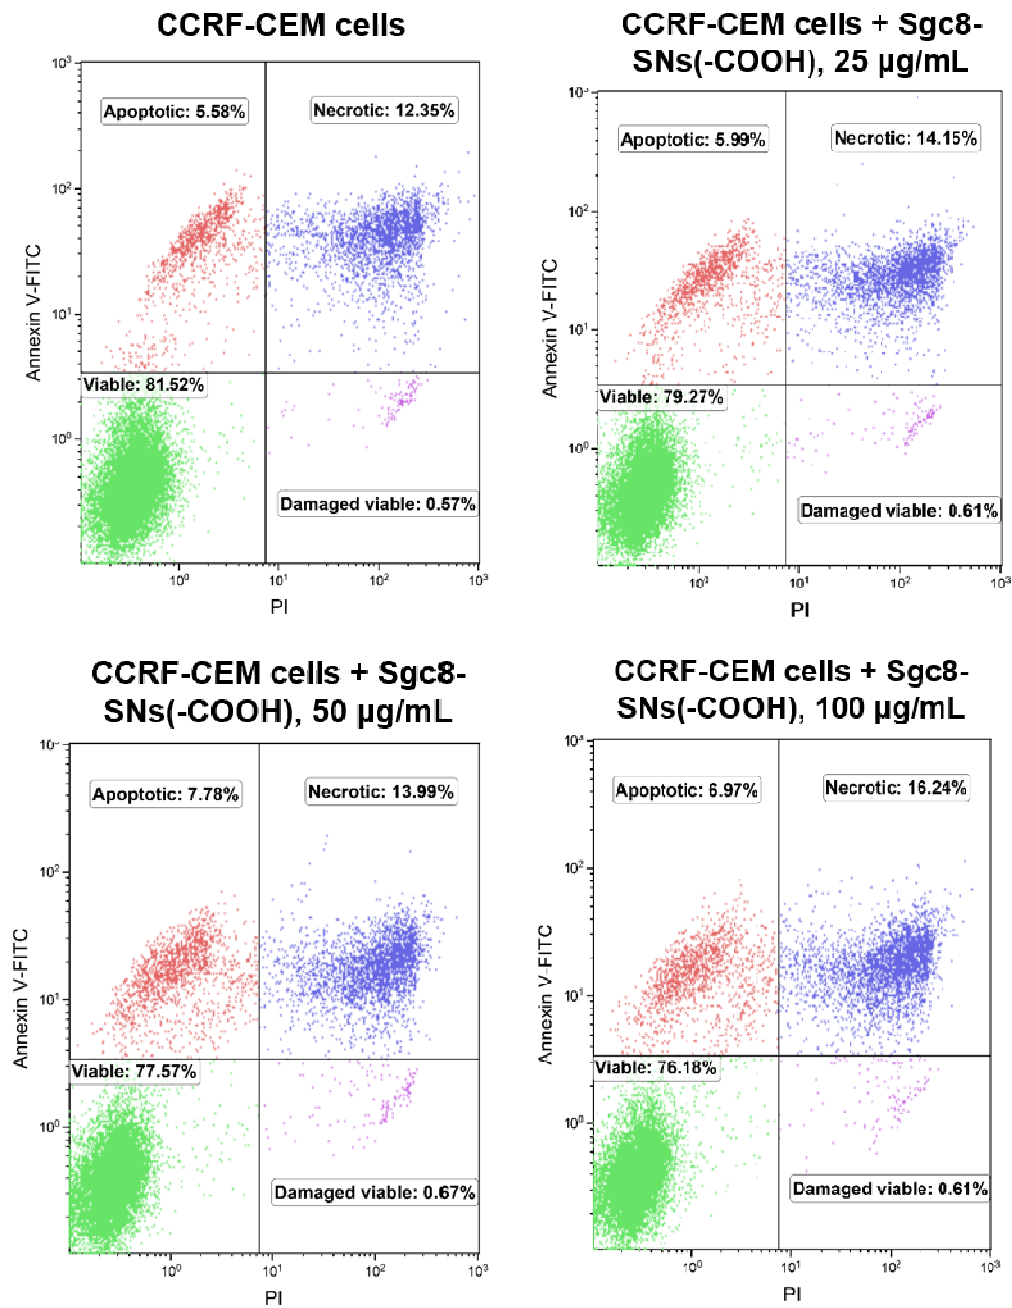

**Figure S4.** Cell viability assay with Annexin V-FITC and PI after 48 hours of incubation. Sgc8-SNs(COOH) concentration: 0 µg/mL (a), 25 µg/mL (b), 50 µg/mL (c) and 100 µg/mL (d).
